# Supplementary material for: Enhancing CO2 bio-mitigation by genetic engineering of cyanobacteria
Source: Royal Society of Chemistry journal article supplement (doi:10.1039/c2ee21124f), 2012-01-01
Supplement: c2ee21124f.pdf [file c2ee21124f.pdf]

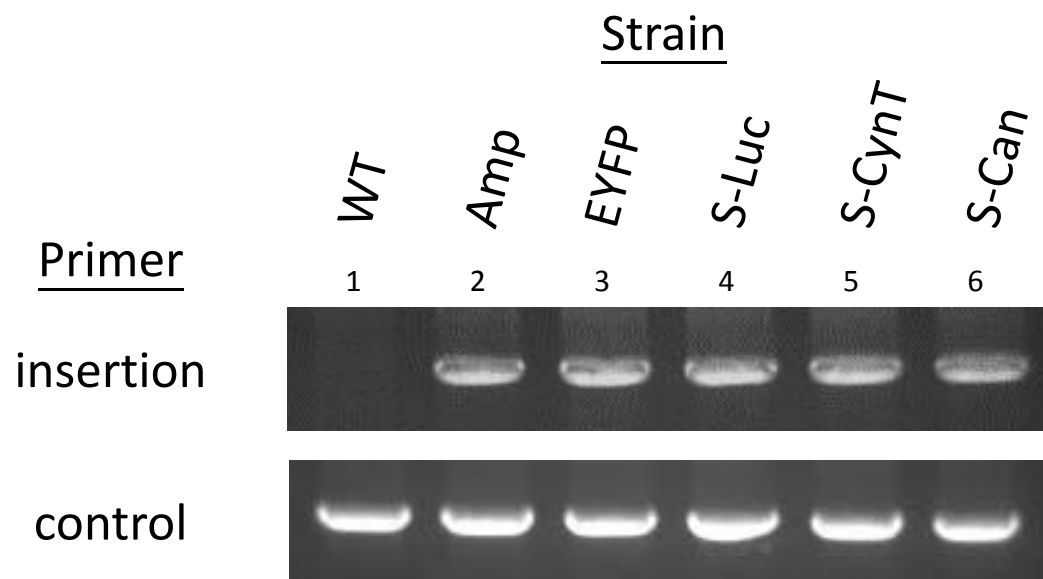

**Suppl. Fig.** PCR confirmation of gene integration into the genome. Correct gene insertion was checked by PCR with insertion-F and PCR-R primers, and the quality of extracted DNA was checked by PCR with control-F and PCR-R. (see PCR primer in Fig. 3).
