# Supplementary material for: Enhancing CO2 bio-mitigation by genetic engineering of cyanobacteria
Source: Royal Society of Chemistry journal article supplement (doi:10.1039/c2ee21124f), 2012-01-01
Supplement: c2ee21124f_2.pdf [file c2ee21124f_2.pdf]

**Suppl. Table 1** Primers used for gene cloning

| <b>Primer</b> | <b>Sequence</b>                                                                  | <b>RE</b> |
|---------------|----------------------------------------------------------------------------------|-----------|
| 5'-NSII-F     | 5' - agattgcctaggcaggcaatcacgatgcgct - 3'                                        | AvrII     |
| 5'-NSII-R     | 5' - ataataccgcggcattgcacacccatcca - 3'                                          | SacII     |
| 3'-NSII-F     | 5' - gatgcgactagtatcaacaagcacacatca - 3'                                         | SpeI      |
| 3'-NSII-R     | 5' - cttgcgtgtacactgagtcgtgatgccaatg - 3'                                        | BsrGI     |
| pBR322-F      | 5' - agttcatgtacacgcgttgctggcggttttc - 3'                                        | BsrGI     |
| pBR322-R      | 5' - agatcacctaggagatcaaaggatcttcttgagatc - 3'                                   | AvrII     |
| AmpR-F        | 5' - attataccgcggctagcgaattcgagctc - 3'                                          | SacII     |
| AmpR-R        | 5' - tggcggactagtttaccatgcttaatcagtgaggca - 3'                                   | SpeI      |
| PrbcL-F       | 5' - ccttgctccgcggatggaaaaagcactgt - 3'                                          | SacII     |
| PrbcL-R       | 5' - ggcggcgaattccatgctctctccctagagatatgtca - 3'                                 | EcoRI     |
| EYFP-F        | 5' - ggtaatgaattcgtgagcaagggcgaggagc - 3'                                        | EcoRI     |
| EYFP-R        | 5' - cctaaacccgggttattactgtacagctcgtccatgc - 3'                                  | XmaI      |
| Sec-F         | 5' - agatcagaattcatgtctgaategctccgctc - 3'                                       | EcoRI     |
| Sec-R         | 5' - tccaggcaattggaacctttttcttctcacc - 3'                                        | MfeI      |
| Luc-F         | 5' - caggtcgaattcatggaagacgccaaaaacat - 3'                                       | EcoRI     |
| Luc-R         | 5' - agttcaccgggttacacggcgatcttcc - 3'                                           | XmaI      |
| CynT-F        | 5' - gaccgagaattcgtgaaagagattattgatggattc - 3'                                   | EcoRI     |
| CynT-R        | 5' - aaaatctagattaatgatgatgatgatgatggtcgcacggcgctcgcct<br>gcggtcgggtggcgtag - 3' | XbaI      |
| Can-F         | 5' - gaccgagaattcatgaaagacatagatacactcacc - 3'                                   | EcoRI     |
| Can-R         | 5' - agagtctagattaatgatgatgatgatgatggtcgcacggcgcttttg<br>tggttggcgtgtttcag - 3'  | XbaI      |

Restriction enzyme (RE) recognition sites are underlined in the sequences.

**Suppl. Table 2** Primers used for PCR confirmation

| <b>Primer</b> | <b>Sequence</b>                |
|---------------|--------------------------------|
| insertion-F   | 5' - gctatgtggcgcggtattat - 3' |
| control-F     | 5' - cagcagttcgttctgttga - 3'  |
| PCR-R         | 5' - ctgcgttattgggtctcgga - 3' |

**Suppl. Table 3** Primers used for RT-PCR

| <b>Primer</b>  | <b>Sequence</b>                 |
|----------------|---------------------------------|
| <i>mpB</i> -F  | 5' - gttgcggctcaggcttcggt - 3'  |
| <i>mpB</i> -R  | 5' - accttgctcccaaccggggt - 3'  |
| <i>eyfp</i> -F | 5' - tatatcatggccgacaagca - 3'  |
| <i>eyfp</i> -R | 5' - gaactccagcaggaccatgt - 3'  |
| <i>luc</i> -F  | 5' - cgatthttgtccagagtctt - 3'  |
| <i>luc</i> -R  | 5' - cgtgatggaatggaacaaca - 3'  |
| <i>cynT</i> -F | 5' - ggcaatategtcccttctac - 3'  |
| <i>cynT</i> -R | 5' - cgcagcttttgacggtaaat - 3'  |
| <i>can</i> -F  | 5' - cgtggttcagatgcagtgg - 3'   |
| <i>can</i> -R  | 5' - ggagtggccccagggtataca - 3' |
